# Supplementary material for: Whole blood DNA methylation analysis reveals respiratory environmental traits involved in COVID-19 severity following SARS-CoV-2 infection
Source: PubMed Central journal article supplement (PMC9357033; doi:10.1038/s41467-022-32357-2), 2022-08-06
Supplement: 41467_2022_32357_MOESM3_ESM.pdf [file 41467_2022_32357_MOESM3_ESM.pdf]

### **Description of Additional Supplementary Files**

File Name: Supplementary Data 1

Description: The file includes all statistics from linear regression model performed in the manuscript, including meqtl analysis.

File Name: Supplementary Data 2

Description: Individual collected clinical information.
